## Racial Differences in Associations Between Adverse Childhood Experiences and Physical, Mental, and Behavioral Health

1. Tracy Lam-Hine, DrPH, Stanford University School of Medicine, Division of Epidemiology & Population Health, Palo Alto, CA
2. Corinne A. Riddell, PhD, University of California Berkeley School of Public Health, Division of Biostatistics and Division of Epidemiology, Berkeley, CA
3. Patrick T. Bradshaw, PhD, University of California Berkeley School of Public Health, Division of Epidemiology, Berkeley, CA
4. Michael Omi, PhD, University of California Berkeley Department of Ethnic Studies, Berkeley, CA
5. Amani M. Allen, PhD, University of California Berkeley School of Public Health, Division of Community Health Sciences and Division of Epidemiology, Berkeley, CA

### Corresponding Author:

Tracy Lam-Hine

Tel: 650-721-4944 | Email: [lamhine@stanford.edu](mailto:lamhine@stanford.edu)

Stanford University School of Medicine, Department of Epidemiology & Population Health  
1701 Page Mill Road, Palo Alto, CA 94304

### Abstract

**Introduction:** Adverse childhood experiences (ACEs) are associated with poor adulthood health, with individuals experiencing multiple ACEs at greatest risk. Multiracial people have high mean ACEs scores and elevated risk of several outcomes, but are infrequently the focus of health equity research. This study aimed to determine whether this group should be targeted for prevention efforts.

**Methods:** We analyzed Waves 1 (1994-95), 3 (2001-02), and 4 (2008-09) of the National Longitudinal Study of Adolescent to Adult Health ( $n = 12,372$ ) in 2023, estimating associations between four or more ACEs and physical (metabolic syndrome, hypertension, asthma), mental (anxiety, depression), and behavioral (suicidal ideation, drug use) outcomes. We estimated risk ratios for each outcome in modified Poisson models with a race  $\times$  ACEs interaction, adjusted for hypothesized confounders of the ACE-outcome relationships. We used the interaction contrast to estimate excess cases per 1,000 individuals for each group relative to Multiracial participants.

**Results:** Excess case estimates of asthma were significantly smaller for White (-123 cases, 95% CI: -251, -4), Black (-141, 95% CI: -285, -6), and Asian (-169, 95% CI: -334, -7) participants compared to Multiracial participants. Black (-100, 95% CI: -189, -10), Asian (-163, 95% CI: -247, -79) and Indigenous (-144, 95% CI: -252, -42) participants had significantly fewer excess cases of and weaker ( $p < 0.001$ ) relative scale association with anxiety compared to Multiracial participants.

**Conclusions:** Adjusted associations between ACEs and asthma or anxiety appear stronger for Multiracial people than other groups. ACEs are universally harmful but may contribute disproportionately to morbidity in this population.

## 1 **Background**

2 Adverse childhood experiences (ACEs), also referred to as childhood or early life  
3 adversity, are traumatic events during childhood and adolescence that are linked to poor health in  
4 adulthood, including five (heart disease, cancer, respiratory diseases, diabetes, and suicide) of the  
5 ten leading causes of death in the United States.<sup>1-3</sup> Over 60% of the US population reports at least  
6 one ACE, with up to a third reporting household emotional abuse, parental divorce, or substance  
7 abuse, specifically.<sup>4,5</sup> While children exposed to ACEs may show immediate signs of distress, the  
8 health impacts of ACEs may manifest over time, as exposure to trauma early in life predisposes  
9 individuals to stressful situations later in life through what has been termed the stress proliferation  
10 chain.<sup>6-9</sup> Trauma is theorized to embed biologically along at least three distinct pathways to  
11 influence health: (1) triggering of the biological stress response and resulting impacts on the  
12 neuroimmune-endocrine axis,<sup>10,11</sup> (2) epigenetic expression,<sup>12-14</sup> and (3) changes in health  
13 behaviors due to adaptation or coping with severe or long-term stress.<sup>15-18</sup>

14 Racial disparities in ACE scores are well-documented, with Multiracial and American  
15 Indian/Native American (AI/NA) populations reporting the highest mean ACE score of any racial  
16 group.<sup>4,19-22</sup> In addition to higher ACE scores, Multiracial people report high prevalence of health  
17 conditions traditionally linked with ACEs, and poor health in several other conditions. Some  
18 studies suggest Multiracial adolescents have poor sleep, behavioral and mental health.<sup>23-29</sup>  
19 Multiracial adults experience the highest prevalence of heart diseases, asthma, obesity, hopeless  
20 feelings, and serious psychological distress of any racial group<sup>30-33</sup>, and are significantly more  
21 likely to be living in poverty, uninsured, and in poor physical health than monoracial White  
22 people.<sup>34,35</sup> Despite these patterns and the growing size of the Multiracial population, investigators  
23 frequently continue to reclassify Multiracial participants into a catchall “other” racial category,

24 existing monoracial categories, or exclude them completely, effectively masking disparities  
25 affecting this group.<sup>36,37</sup>

26 To our knowledge, only two ACEs studies<sup>38,39</sup> have estimated associations specifically for  
27 Multiracial populations. Hall et al's<sup>38</sup> study of asthma found that Multiracial participants had the  
28 highest mean ACE score and asthma prevalence of any racial group, but no differences in race-  
29 specific interaction odds ratios from the reference group (Asians). LaBrenz et al<sup>39</sup> modeled days  
30 of poor mental and physical health, and estimated additive interactions between race and ACE  
31 scores. Interaction terms in the mental health model were positive for the Black, Asian, Pacific  
32 Islander, Multiracial and "Other" racial groups compared to Whites. For poor physical health days,  
33 interaction effect estimates were close to zero and less precise. One small study of monoracial  
34 White and Black adolescents in the US South found a stronger dose-response relationship between  
35 ACE score and depressive symptoms scores for Black compared to White participants.<sup>40</sup> Other  
36 studies examining monoracial adolescents<sup>41</sup> and adults<sup>42,43</sup> have generally found no moderation of  
37 health outcomes by race. These findings suggest that the strength of some ACE-health outcome  
38 relationships may vary across racial groups, with the direction depending on the referent racial  
39 group.

40 We leverage a nationally representative sample of young adults to determine if the  
41 association between ACEs and a range of physical, behavioral, and mental health outcomes are  
42 stronger for Multiracial people, and by extension, if prevention efforts should target this group.

43

## 44 **Methods**

### 45 Study Sample

46 The National Longitudinal Study of Adolescent to Adult Health (Add Health) is a

47 longitudinal, nationally representative study following over 20,000 individuals enrolled in grades  
48 7-12 in 1994-95 through four waves of follow-up (1996, 2001-02, 2008-09, 2016-18).<sup>44</sup> Eighty  
49 middle and high schools were selected non-randomly for size, type, grade range, setting,  
50 demographics, and geographic location. Students were sampled randomly without stratification  
51 from these schools' enrollment rosters and invited to complete an at-home interview during Wave  
52 1 (n=20,745) which asked questions about the adolescent's demographics, family background,  
53 social networks, home and school environments, and health behaviors. Wave 3 (n=15,197)  
54 collected additional life experience and medication information. Wave 4 (n=15,701) was  
55 conducted when participants were in their late twenties and included measurements of participants'  
56 metabolic and cardiovascular function.

57 We categorized participants into five racial groups: White alone, Black alone, Asian alone,  
58 American Indian/Native American (AI/NA) alone, (hereafter White, Black, Asian, or AI/NA) or  
59 Multiracial. Waves 1 and 3 asked participants to self-identify their race; we used Wave 3 race  
60 unless a participant identified as Multiracial at Wave 1 but not Wave 3, in which case we classified  
61 them as Multiracial. We excluded Hispanic/Latino participants because race and Hispanic  
62 ethnicity are assessed independently in Add Health, making it impossible to fully enumerate  
63 Hispanic/Latino participants that also identify as Multiracial. This is because in contrast to the  
64 current federal racial/ethnic categorization schema, some (but not all) Hispanic/Latino individuals  
65 regard this label as a racial identity.<sup>23,45</sup>

## 66 Measures

67 Because differential exposure to ACEs may be linked to racial disparities in health through  
68 the stress pathway, we investigated physical, mental, and behavioral outcomes (groupings  
69 described below) for which (1) Multiracial Americans experience relatively poor health outcomes,

70 and (2) are associated with ACEs and overactivation of the stress pathway.<sup>46-50</sup> We measured  
71 outcomes once for each individual in either Wave 3 (ages 18-26) or 4 (24-32) based on data  
72 availability. Appendix A contains details on construction of outcomes and covariates.

- 73 • *Physical health: metabolic syndrome (MetS), hypertension, and asthma.* We assessed  
74 MetS using clinically-relevant cutoffs for eight biomarkers across five categories: (1)  
75 hypertension (systolic blood pressure  $\geq 130$  mmHg, diastolic blood pressure  $\geq 80$   
76 mmHg),<sup>51</sup> self-reported ever diagnosed with hypertension, or self-reported current  
77 hypertension medication use), (2) waist circumference ( $> 102$  cm for males,  $> 80$  cm  
78 for females), (3) triglycerides (top 3 deciles for males, top 2 for females), (4) high-  
79 density lipoprotein (bottom 2 deciles for males, bottom 3 for females), and (5) diabetes  
80 (glycated hemoglobin  $> 5.7\%$ , self-reported anti-diabetic medication use, or self-  
81 reported diabetes diagnosis).<sup>52</sup> We categorized individuals with values exceeding  
82 cutoffs in three or more of the five categories as having MetS.<sup>52-56</sup> Hypertension coding  
83 when considering it as a separate outcome mirrored that used for the MetS measure.  
84 We coded participants as having asthma if they indicated a previous diagnosis.<sup>57</sup>
- 85 • *Mental health: depression and anxiety.* We classified participants as having depression  
86 if they indicated using prescription depression medications in the last year or having a  
87 previous depression diagnosis, and as having anxiety if they indicated a previous  
88 anxiety diagnosis.
- 89 • *Behavioral health: suicidal ideation and drug use.* We coded participants as having  
90 suicidal ideation if they indicated seriously thinking about committing suicide in the  
91 last year, and using drugs if they indicated ever using cocaine, crystal meth, heroin,  
92 other illegal drugs other than marijuana, or ever misusing prescription drugs.

93

94           The original ACEs questionnaire included ten questions each covering a domain of adverse  
95 experiences: emotional, physical, and sexual abuse, emotional and physical neglect, parental  
96 separation or divorce, mother treated violently, household substance abuse, household mental  
97 illness, and incarceration of household member.<sup>58</sup> Researchers constructing ACEs scores using  
98 Add Health data have used varying sets of questions about events occurring before age 18 to  
99 approximate the original ACEs questionnaire.<sup>59–63</sup> We used a modified version of the widest set of  
100 questions available, some of which were answered by participants’ parents in Wave 1, and others  
101 retrospectively by participants during Waves 3 or 4. We dichotomized and summed responses to  
102 create a summary score from zero to ten. We categorized participants reporting four or more ACEs  
103 as exposed, as a previous meta-analysis found elevated risk above this level for all studied negative  
104 physical, mental, and behavioral health outcomes.<sup>64</sup> We conducted sensitivity analyses using the  
105 summary score instead of a dichotomized exposure. Questions and response categories used are  
106 shown in Appendix B.

107           We identified confounders using a directed acyclic graph. Our models were adjusted for  
108 age, sex, parental education, household size-adjusted income, parental support, and neighborhood  
109 disadvantage score as confounders. We drew age and sex from Wave 4 to match timing of collected  
110 biomarkers. The Wave 4 questionnaire asked respondents to report their gender but only provided  
111 “male” and “female” as response options; we thus consider this variable to represent biological  
112 sex. Following previous Add Health analyses, we categorized parental education as the higher of  
113 either parent’s Wave 1 parental education after categorization into a five-level ordinal variable  
114 (less than high school, completed vocational school, or GED; high school diploma; some college;  
115 college graduate or greater).<sup>65</sup> We calculated household size-adjusted income as total reported pre-

116 tax household income divided by the square root of total reported household members at Wave  
117 1.<sup>66</sup> We coded parental support as the mean of Likert-scale responses (very much, quite a bit, some,  
118 a little, none at all) to five Wave 1 questions about participants' relationship and communication  
119 with their parents.<sup>67,68</sup> We constructed a crude neighborhood disadvantage score by averaging five  
120 census tract-level proportions from participants' Wave 1 residence: (1) percent households with  
121 incomes below the federal poverty level, (2) percent households receiving public assistance, (3)  
122 civilian unemployment rate, (4) percent persons 25 years or older with no high school diploma or  
123 equivalency, and (5) percent female-headed households.<sup>55,69</sup>

124

### 125 Statistical analyses

126 For each outcome, we specified a modified Poisson model to estimate risk ratios.<sup>70</sup> We  
127 visually assessed assumptions of linearity between exposure and log-transformed risk of outcomes  
128 for each racial group by comparing observed data with linear model-generated smooth plots. All  
129 models interacted ACEs and race to estimate subgroup-specific associations. Because our aim was  
130 to understand if associations are stronger for Multiracial people, we specified Multiracial  
131 participants as the reference group in all interactions. We also conducted sensitivity analyses with  
132 Whites as the referent group to compare findings with previous studies which have used this  
133 approach.

134 We used complex survey weights corresponding to a cross-sectional multi-wave analysis  
135 to produce nationally representative estimates using the “survey” package in R.<sup>71,72</sup> Because 55%  
136 of observations were missing data on an ACE component, 21% on a covariate, and 40% on an  
137 outcome (frequencies presented in Appendix C), we used multiple imputation including all  
138 outcomes in imputations models, and pooled results across 20 imputed datasets.<sup>73</sup> We imputed

139 data using the “mi” and “mitools” packages in R.<sup>74,75</sup> We summed and dichotomized ACE scores  
140 in regression analyses after imputation of missing ACE component variables.

141 We assessed interactions on the relative scale by estimating subgroup specific risk ratios  
142 (RRs), and on the absolute scale by estimating the interaction contrast, scaled up to reflect excess  
143 cases per 1,000 (formula and details in Appendix D).<sup>76</sup> We assessed statistical differences between  
144 group RRs using p-values with pre-specified  $\alpha = 0.05$  from global Wald tests for significance of  
145 interaction terms. We deemed excess case estimates with 95% confidence intervals (CI) not  
146 containing zero (null value) as significant.

147 The UC Berkeley Office for Protection of Human Subjects determined that this study did  
148 not meet the threshold definition of human subjects research; we conducted analyses in 2023.

149

## 150 **Results**

151 Post-hoc analysis led us to exclude individuals who identified as “Other” race alone due to  
152 small sample size (n=23) and overly wide CIs. Table 1 shows key characteristics (unweighted  
153 counts and weighted statistics pooled from imputations) in the overall study sample. Sample size  
154 in models with self-reported outcome data was 12,372. Biomarkers can be affected by pregnancy,  
155 thus we excluded 445 pregnant participants from the MetS and hypertension models. In the overall  
156 study sample, there were 7,742 (74%) White, 2,915 (17%) Black, 805 (3.2%) Asian, 76 (0.6%)  
157 AI/NA, and 834 (5.8%) Multiracial participants. Mean age, sex ratios, and parental support scores  
158 were approximately even across racial groups. White and Asian participants’ households had  
159 parents with higher educational attainment, higher equivalence-scaled income, and lower  
160 neighborhood disadvantage scores compared to Black and AI/NA participants. On these measures,  
161 Multiracial participants were less advantaged than White and Asian but more advantaged than



162 Black and AI/NA participants.

163 Exposure to elevated ACEs was highest among AI/NA (40%), Multiracial (35%), and  
164 Black participants (33%). Multiracial participants had the highest prevalence of asthma (24%) and  
165 anxiety (18%), and along with Whites, the highest prevalence of depression (35%). For all other  
166 outcomes, AI/NA participants had the highest prevalence. Asian participants reported the lowest  
167 prevalence of all outcomes except for drug use, for which Black participants had the lowest  
168 prevalence (12%). White and Asian participants had the lowest prevalence of MetS (27%).

169

170 < Table 1 here >

171

172 Table 2 summarizes within-group RRs and 95% CIs for each outcome. For the overall  
173 sample, increased risks associated with elevated ACEs were null for MetS and hypertension, small  
174 (4-5%) for asthma, anxiety, and suicidal ideation, and stronger (10-13%) for depression and drug  
175 use. Risks of asthma, anxiety, depression, and drug use increased 12-14% among Multiracial  
176 participants, and of drug use by 30% for AI/NA participants. Associations were strongest with  
177 depression and drug use (8-13% increased risk) for White and Black participants, and with  
178 depression, suicidal ideation, and drug use (8-10%) for Asians. We estimated RRs for interaction  
179 using Multiracial participants as the referent group; Table 3 summarizes the exponentiated  
180 interaction term betas from each model. Values covered by CIs around interaction terms in the  
181 asthma model were also consistent with weaker associations for White (0.92, 95% CI: 0.85, 1.00),  
182 Black (0.91, 95% CI: 0.83, 1.00) and Asian (0.89, 95% CI: 0.79, 1.00) participants. CIs around  
183 interaction terms in the anxiety model were also consistent with stronger association for  
184 Multiracial individuals compared to all other groups. CIs for (Black (0.93, 95% CI: 0.86, 0.99),

185 Asian (0.87, 95% CI: 0.82, 0.94), AI/NA (0.89, 95% CI: 0.81, 0.97) participants did not include  
186 the null. Global Wald tests for interaction were only significant for anxiety ( $p < 0.001$ ).

187

188 < Table 2 here >

189 < Table 3 here >

190

191 Table 4 summarizes excess cases per 1,000 associated with elevated ACEs, with the  
192 Multiracial group as the reference. Results were mostly consistent with interaction RRs in Table  
193 3. CIs around estimates in the asthma model suggested significantly weaker fewer excess cases for  
194 White (-123, 95% CI: -251, -4), Black (-141, 95% CI: -285, -6), and Asian (-169, 95% CI: -334, -  
195 7) participants. There were significantly fewer excess cases of anxiety for Black (-100, 95% CI: -  
196 189, -10), Asian (-163, 95% CI: -247, -79), and AI/NA (-144, 95% CI: -252, -42) participants; the  
197 estimate and CI for Whites (-71, 95% CI: -165, 25) also suggested a weaker association compared  
198 to Multiracial participants. CIs around excess case estimates were wide for some outcomes,  
199 especially for the AI/NA and Asian groups.

200

201 < Table 4 here >

202

203 Appendix E summarizes results from the first sensitivity analysis which specified summary  
204 ACE score (rather than  $\geq 4$  ACEs) as the exposure, keeping Multiracial participants as the  
205 reference. Direction and significance of results were similar to the main analysis. Appendix F  
206 displays results from the second sensitivity analysis which specified White participants as the  
207 reference, keeping elevated ACEs as the exposure. Directions of results were consistent with the

208 main analysis.

209

## 210 **Discussion**

211 Our study aimed to explore whether the association of ACEs with physical, mental, and  
212 behavioral health outcomes differs by race, and in particular, if Multiracial individuals should be  
213 prioritized for interventions given their unique ACEs and health risk profile. We found evidence  
214 that, compared to Black, Asian, and AI/NA participants, Multiracial people experience greater  
215 excess cases of anxiety (and relative strength of association) associated with ACEs, regardless of  
216 ACEs coding scheme. We also estimated that Multiracial participants have more excess cases of  
217 asthma associated with elevated ACEs compared to most other racial groups examined.

218 Data from the National Health Interview Survey show that prevalence of asthma and  
219 anxious symptoms are disproportionately and significantly higher among Multiracial people than  
220 other racial groups.<sup>31,33</sup> ACEs may thus contribute meaningfully to the disparity in asthma and  
221 anxiety for Multiracial adults. Future studies that estimate attributable risk will aid our  
222 understanding of the potential health equity benefits of preventing exposure to ACEs.

223 Although ACEs are a well-established risk factor for a variety of poor adulthood health  
224 outcomes, the structural and social processes that determine disparities in exposure to ACEs, and  
225 the causes of variability in race-specific associations are not well understood. Despite Multiracial  
226 children's high rate of exposure to ACEs, and even though the 2020 Census reports that one in ten  
227 people selected two or more races<sup>77</sup>, health equity research continues to overlook the Multiracial  
228 population. While our study does not explore structural processes or the causes of disparities in  
229 exposure and associations, it does highlight the contribution of ACEs to the burden of respiratory  
230 and mental health morbidity among Multiracial adults.

231

232 Limitations

233 Our study had strengths, including a uniquely large representative and longitudinal sample  
234 of Multiracial participants and multiple investigated outcomes. However, there were also  
235 limitations. First, the racial categories used in this analysis and health research generally collapse  
236 large amounts of within-group variability in patterns of health and disadvantage; subgroup  
237 analyses thus produce only a rough proxy for markers of elevated risk and should be contextualized  
238 with other knowledge. Second, our ACEs measure is unique to Add Health and had high levels of  
239 missingness. Measures for asthma, anxiety, and depression were self-reported, and may be biased  
240 downward for racial groups with less healthcare access or where mental health conditions are  
241 especially stigmatized.<sup>78</sup> Our measure of parental education used highest reported level between  
242 either parent rather than primary caregiver, which some research suggests may better predict child  
243 health.<sup>79</sup> Finally, small sample sizes particularly for Asian and AI/NA groups contributed to wide  
244 CIs around excess case estimates; future studies should repeat this analysis in larger longitudinal  
245 cohorts with greater numbers of Asian and AI/NA participants.

246

247 **Conclusion**

248 To our knowledge, this is the first study finding that exposure to ACEs is associated with  
249 excess risk of anxiety and asthma for Multiracial people, a finding that would be obscured if  
250 Multiracial people were recategorized into an “other” or monoracial categories. Given the large  
251 and growing size of the Multiracial population and inequitable rates of exposure to ACEs among  
252 Multiracial children, addressing and preventing ACEs is an urgent health equity issue. While  
253 intervening to reduce exposure to ACEs will be universally beneficial for all racial groups, such

254 programs may especially benefit the respiratory and mental health of the Multiracial population.  
255 Future studies should continue to examine the aggregate and group-specific population health  
256 benefits of preventing ACEs to improve health equity.

## **Financial disclosures**

This work was supported by NIH-NCATS-CTSA grant UL1TR003142 and contract 75D30122P12974 with the Centers for Disease Control and Prevention.

## **Acknowledgements**

The authors would like to thank the Add Health study participants for donating their time and information to the study of social experiences and health. Thanks as well to Kim Harley for facilitating access to the data, to Christian Jackson for reviewing the code used in this analysis, and to David Rehkopf for thought partnership during manuscript development.

## References

1. Centers for Disease Control and Prevention. Adverse Childhood Experiences (ACEs). Published April 2, 2021. Accessed April 5, 2022. <https://www.cdc.gov/violenceprevention/aces/index.html>
2. Petruccelli K, Davis J, Berman T. Adverse childhood experiences and associated health outcomes: A systematic review and meta-analysis. *Child Abuse Negl.* 2019;97:104127. doi:10.1016/j.chiabu.2019.104127
3. Kalmakis KA, Chandler GE. Health consequences of adverse childhood experiences: A systematic review. *J Am Assoc Nurse Pract.* 2015;27(8):457-465. doi:10.1002/2327-6924.12215
4. Merrick MT, Ford DC, Ports KA, Guinn AS. Prevalence of Adverse Childhood Experiences From the 2011-2014 Behavioral Risk Factor Surveillance System in 23 States. *JAMA Pediatr.* 2018;172(11):1038. doi:10.1001/jamapediatrics.2018.2537
5. Felitti VJ, Anda RF, Nordenberg D, et al. Relationship of Childhood Abuse and Household Dysfunction to Many of the Leading Causes of Death in Adults. *Am J Prev Med.* 1998;14(4):245-258. doi:10.1016/S0749-3797(98)00017-8
6. Jones TM, Nurius P, Song C, Fleming CM. Modeling life course pathways from adverse childhood experiences to adult mental health. *Child Abuse Negl.* 2018;80:32-40. doi:10.1016/j.chiabu.2018.03.005
7. Nurius PS, Green S, Logan-Greene P, Borja S. Life course pathways of adverse childhood experiences toward adult psychological well-being: A stress process analysis. *Child Abuse Negl.* 2015;45:143-153. doi:10.1016/j.chiabu.2015.03.008
8. Manyema M, Norris SA, Richter LM. Stress begets stress: the association of adverse childhood experiences with psychological distress in the presence of adult life stress. *BMC Public Health.* 2018;18(1):835. doi:10.1186/s12889-018-5767-0
9. Hertzman C, Power C. Health and Human Development: Understandings From Life-Course Research. *Dev Neuropsychol.* 2003;24(2-3):719-744. doi:10.1080/87565641.2003.9651917
10. Stewart JA. The Detrimental Effects of Allostasis: Allostatic Load as a Measure of Cumulative Stress. *J Physiol Anthropol.* 2006;25(1):133-145. doi:10.2114/jpa2.25.133
11. Kelly-Irving M, Mabile L, Grosclaude P, Lang T, Delpierre C. The embodiment of adverse childhood experiences and cancer development: potential biological mechanisms and pathways across the life course. *Int J Public Health.* 2013;58(1):3-11. doi:10.1007/s00038-012-0370-0
12. Labonté B, Suderman M, Maussion G, et al. Genome-wide Epigenetic Regulation by Early-Life Trauma. *Arch Gen Psychiatry.* 2012;69(7). doi:10.1001/archgenpsychiatry.2011.2287
13. Moore LD, Le T, Fan G. DNA Methylation and Its Basic Function. *Neuropsychopharmacology.* 2013;38(1):23-38. doi:10.1038/npp.2012.112
14. CDC. What is Epigenetics? | CDC. Centers for Disease Control and Prevention. Published August 3, 2020. Accessed April 26, 2022. <https://www.cdc.gov/genomics/disease/epigenetics.htm>

15. Wiss DA, Brewerton TD. Adverse Childhood Experiences and Adult Obesity: A Systematic Review of Plausible Mechanisms and Meta-Analysis of Cross-Sectional Studies. *Physiol Behav.* 2020;223:112964. doi:10.1016/j.physbeh.2020.112964
16. Su S, Jimenez MP, Roberts CTF, Loucks EB. The Role of Adverse Childhood Experiences in Cardiovascular Disease Risk: a Review with Emphasis on Plausible Mechanisms. *Curr Cardiol Rep.* 2015;17(10):88. doi:10.1007/s11886-015-0645-1
17. Vig KD, Paluszek MM, Asmundson GJG. ACEs and physical health outcomes. In: *Adverse Childhood Experiences*. Elsevier; 2020:71-90. doi:10.1016/B978-0-12-816065-7.00005-7
18. Wekerle C, Hébert M, Daigneault I, Fortin-Langelier E, Smith S. ACEs, sexual violence, and sexual health. In: *Adverse Childhood Experiences*. Elsevier; 2020:91-118. doi:10.1016/B978-0-12-816065-7.00006-9
19. Giano Z, Wheeler DL, Hubach RD. The frequencies and disparities of adverse childhood experiences in the U.S. *BMC Public Health.* 2020;20(1):1327. doi:10.1186/s12889-020-09411-z
20. Skewes MC, Blume AW. Understanding the link between racial trauma and substance use among American Indians. *Am Psychol.* 2019;74(1):88-100. doi:10.1037/amp0000331
21. Kenney MK, Singh GK. Adverse Childhood Experiences among American Indian/Alaska Native Children: The 2011-2012 National Survey of Children's Health. *Scientifica.* 2016;2016:1-14. doi:10.1155/2016/7424239
22. Cronholm PF, Forke CM, Wade R, et al. Adverse Childhood Experiences. *Am J Prev Med.* 2015;49(3):354-361. doi:10.1016/j.amepre.2015.02.001
23. Udry JR, Li RM, Hendrickson-Smith J. Health and Behavior Risks of Adolescents with Mixed-Race Identity. *Am J Public Health.* 2003;93(11):1865-1870. doi:10.2105/AJPH.93.11.1865
24. Straka BC, Gaither SE, Acheson SK, Swartzwelder HS. "Mixed" Drinking Motivations: A Comparison of Majority, Multiracial, and Minority College Students. *Soc Psychol Personal Sci.* Published online November 19, 2019:194855061988329. doi:10.1177/1948550619883294
25. Pang YC. *The Relationship between Perceived Discrimination, Economic Pressure, Depressive Symptoms, and Educational Attainment of Ethnic Minority Emerging Adults: The Moderating Role of School Connectedness during Adolescence*. Master of Science. Iowa State University, Digital Repository; 2015. doi:10.31274/etd-180810-4045
26. Doyle JM. *THE PHYSICAL AND MENTAL HEALTH OF MULTIRACIAL ADOLESCENTS IN THE UNITED STATES*. University of Michigan; 2007.
27. Goodhines PA, Desalu JM, Zaso MJ, Gellis LA, Park A. Sleep Problems and Drinking Frequency among Urban Multiracial and Monoracial Adolescents: Role of Discrimination Experiences and Negative Mood. *J Youth Adolesc.* 2020;49(10):2109-2123. doi:10.1007/s10964-020-01310-1
28. Choi Y, Harachi TW, Gillmore MR, Catalano RF. Are multiracial adolescents at greater risk? Comparisons of rates, patterns, and correlates of substance use and violence between monoracial and multiracial adolescents. *Am J Orthopsychiatry.* 2006;76(1):86-97. doi:10.1037/0002-9432.76.1.86



29. Goings TC, Salas-Wright CP, Howard MO, Vaughn MG. Substance use among bi/multiracial youth in the United States: Profiles of psychosocial risk and protection. *Am J Drug Alcohol Abuse*. 2018;44(2):206-214. doi:10.1080/00952990.2017.1359617
30. National Center for Health Statistics. Summary Health Statistics, Selected Circulatory Diseases: National Health Interview Survey, 2018. Published 2018. Accessed May 16, 2023. [https://ftp.cdc.gov/pub/Health\\_Statistics/NCHS/NHIS/SHS/2018\\_SHS\\_Table\\_A-1.pdf](https://ftp.cdc.gov/pub/Health_Statistics/NCHS/NHIS/SHS/2018_SHS_Table_A-1.pdf)
31. National Center for Health Statistics. Summary Health Statistics, Respiratory Diseases: National Health Interview Survey, 2018. Published 2018. Accessed May 16, 2023. [https://ftp.cdc.gov/pub/Health\\_Statistics/NCHS/NHIS/SHS/2018\\_SHS\\_Table\\_A-2.pdf](https://ftp.cdc.gov/pub/Health_Statistics/NCHS/NHIS/SHS/2018_SHS_Table_A-2.pdf)
32. National Center for Health Statistics. Summary Health Statistics, Body Mass Index: National Health Interview Survey, 2018. Published 2018. Accessed May 16, 2023. [https://ftp.cdc.gov/pub/Health\\_Statistics/NCHS/NHIS/SHS/2018\\_SHS\\_Table\\_A-15.pdf](https://ftp.cdc.gov/pub/Health_Statistics/NCHS/NHIS/SHS/2018_SHS_Table_A-15.pdf)
33. National Center for Health Statistics. Summary Health Statistics, Mental Health Conditions: National Health Interview Survey, 2018. Published 2018. Accessed March 14, 2023. [https://ftp.cdc.gov/pub/Health\\_Statistics/NCHS/NHIS/SHS/2018\\_SHS\\_Table\\_A-8.pdf](https://ftp.cdc.gov/pub/Health_Statistics/NCHS/NHIS/SHS/2018_SHS_Table_A-8.pdf)
34. *Summary Health Statistics: National Health Interview Survey*. Centers for Disease Control and Prevention; 2018. Accessed October 6, 2020. [https://ftp.cdc.gov/pub/Health\\_Statistics/NCHS/NHIS/SHS/2018\\_SHS\\_Table\\_A-7.pdf](https://ftp.cdc.gov/pub/Health_Statistics/NCHS/NHIS/SHS/2018_SHS_Table_A-7.pdf)
35. Subica AM, Agarwal N, Sullivan JG, Link BG. Obesity and Associated Health Disparities Among Understudied Multiracial, Pacific Islander, and American Indian Adults: Understudied Racial Disparities in Obesity. *Obesity*. 2017;25(12):2128-2136. doi:10.1002/oby.21954
36. Charmaraman L, Woo M, Quach A, Erkut S. How have researchers studied multiracial populations? A content and methodological review of 20 years of research. *Cultur Divers Ethnic Minor Psychol*. 2014;20(3):336-352. doi:10.1037/a0035437
37. Facente SN, Lam-Hine T, Bhatta DN, Hecht J. Impact of Racial Categorization on Effect Estimates: An HIV Stigma Analysis. *Am J Epidemiol*. Published online January 5, 2022:kwab289. doi:10.1093/aje/kwab289
38. Hall T, Rooks R, Kaufman C. Intersections of Adverse Childhood Experiences, Race and Ethnicity and Asthma Outcomes: Findings from the Behavioral Risk Factor Surveillance System. *Int J Environ Res Public Health*. 2020;17(21):8236. doi:10.3390/ijerph17218236
39. LaBrenz CA, O’Gara JL, Panisch LS, Baiden P, Larkin H. Adverse childhood experiences and mental and physical health disparities: the moderating effect of race and implications for social work. *Soc Work Health Care*. 2020;59(8):588-614. doi:10.1080/00981389.2020.1823547
40. Youssef NA, Belew D, Hao G, et al. Racial/ethnic differences in the association of childhood adversities with depression and the role of resilience. *J Affect Disord*. 2017;208:577-581. doi:10.1016/j.jad.2016.10.024
41. Stinson EA, Sullivan RM, Peteet BJ, et al. Longitudinal Impact of Childhood Adversity on Early Adolescent Mental Health During the COVID-19 Pandemic in the ABCD Study Cohort: Does Race or Ethnicity Moderate Findings? *Biol Psychiatry Glob Open Sci*. 2021;1(4):324-335.

doi:10.1016/j.bpsgos.2021.08.007

42. Assini-Meytin LC, Fix RL, Green KM, Nair R, Letourneau EJ. Adverse Childhood Experiences, Mental Health, and Risk Behaviors in Adulthood: Exploring Sex, Racial, and Ethnic Group Differences in a Nationally Representative Sample. *J Child Adolesc Trauma*. 2022;15(3):833-845. doi:10.1007/s40653-021-00424-3
43. Lee RD, Chen J. Adverse childhood experiences, mental health, and excessive alcohol use: Examination of race/ethnicity and sex differences. *Child Abuse Negl*. 2017;69:40-48. doi:10.1016/j.chiabu.2017.04.004
44. Harris KM. The Add Health Study: Design and Accomplishments. Published online 2013. doi:10.17615/C6TW87
45. Taylor P, Lopez MH, Martínez J, Velasco G. When Labels Don't Fit: Hispanics and Their Views of Identity. Pew Research Center's Hispanic Trends Project. Published April 4, 2012. Accessed July 22, 2022. <https://www.pewresearch.org/hispanic/2012/04/04/when-labels-dont-fit-hispanics-and-their-views-of-identity/>
46. Williams DR, Neighbors H. Racism, discrimination and hypertension: evidence and needed research. *Ethn Dis*. 2001;11(4):800-816.
47. National Heart, Lung, and Blood Institute. Metabolic Syndrome | NHLBI, NIH. Published December 2020. Accessed March 3, 2021. <https://www.nhlbi.nih.gov/health-topics/metabolic-syndrome>
48. Cuevas AG, Williams DR, Albert MA. Psychosocial Factors and Hypertension. *Cardiol Clin*. 2017;35(2):223-230. doi:10.1016/j.ccl.2016.12.004
49. Exley D, Norman A, Hyland M. Adverse childhood experience and asthma onset: a systematic review. *Eur Respir Rev*. 2015;24(136):299-305. doi:10.1183/16000617.00004114
50. Chen E, Miller GE. Stress and inflammation in exacerbations of asthma. *Brain Behav Immun*. 2007;21(8):993-999. doi:10.1016/j.bbi.2007.03.009
51. Whelton PK, Carey RM, Aronow WS, et al. 2017 ACC/AHA/AAPA/ABC/ACPM/AGS/APhA/ASH/ASPC/NMA/PCNA Guideline for the Prevention, Detection, Evaluation, and Management of High Blood Pressure in Adults: A Report of the American College of Cardiology/American Heart Association Task Force on Clinical Practice Guidelines. *Hypertension*. 2018;71(6):e13-e115. doi:10.1161/HYP.0000000000000065
52. Bohr AD, Laurson K, McQueen MB. A novel cutoff for the waist-to-height ratio predicting metabolic syndrome in young American adults. *BMC Public Health*. 2016;16(1):295. doi:10.1186/s12889-016-2964-6
53. Gaydosh L, Schorpp KM, Chen E, Miller GE, Harris KM. College completion predicts lower depression but higher metabolic syndrome among disadvantaged minorities in young adulthood. *Proc Natl Acad Sci*. 2018;115(1):109-114. doi:10.1073/pnas.1714616114
54. Miller GE, Chen E, Yu T, Brody GH. Youth Who Achieve Upward Socioeconomic Mobility Display Lower Psychological Distress But Higher Metabolic Syndrome Rates as Adults: Prospective Evidence From Add Health and MIDUS. *J Am Heart Assoc*. 2020;9(9).

doi:10.1161/JAHA.119.015698

55. Martin CL, Kane JB, Miles GL, Aiello AE, Harris KM. Neighborhood disadvantage across the transition from adolescence to adulthood and risk of metabolic syndrome. *Health Place*. 2019;57:131-138. doi:10.1016/j.healthplace.2019.03.002
56. Colen CG, Pinchak NP, Barnett KS. Racial Disparities in Health Among College-Educated African Americans: Can Attendance at Historically Black Colleges or Universities Reduce the Risk of Metabolic Syndrome in Midlife? *Am J Epidemiol*. Published online November 5, 2020:kwaa245. doi:10.1093/aje/kwaa245
57. Harris KM, Gordon-Larsen P, Chantala K, Udry JR. Longitudinal Trends in Race/Ethnic Disparities in Leading Health Indicators From Adolescence to Young Adulthood. *Arch Pediatr Adolesc Med*. 2006;160(1):74. doi:10.1001/archpedi.160.1.74
58. About the CDC-Kaiser ACE Study |Violence Prevention|Injury Center|CDC. Published November 3, 2021. Accessed January 10, 2022. <https://www.cdc.gov/violenceprevention/aces/about.html>
59. Easterlin MC, Chung PJ, Leng M, Dudovitz R. Association of Team Sports Participation With Long-term Mental Health Outcomes Among Individuals Exposed to Adverse Childhood Experiences. *JAMA Pediatr*. 2019;173(7):681. doi:10.1001/jamapediatrics.2019.1212
60. LeTendre ML, Reed MB. The Effect of Adverse Childhood Experience on Clinical Diagnosis of a Substance Use Disorder: Results of a Nationally Representative Study. *Subst Use Misuse*. 2017;52(6):689-697. doi:10.1080/10826084.2016.1253746
61. Brumley LD, Jaffee SR, Brumley BP. Pathways from Childhood Adversity to Problem Behaviors in Young Adulthood: The Mediating Role of Adolescents' Future Expectations. *J Youth Adolesc*. 2017;46(1):1-14. doi:10.1007/s10964-016-0597-9
62. Lee H, Kim Y, Terry J. Adverse childhood experiences (ACEs) on mental disorders in young adulthood: Latent classes and community violence exposure. *Prev Med*. 2020;134:106039. doi:10.1016/j.ypmed.2020.106039
63. Otero C. Adverse Childhood Experiences (ACEs) and Timely Bachelor's Degree Attainment. *Soc Sci*. 2021;10(2):44. doi:10.3390/socsci10020044
64. Hughes K, Bellis MA, Hardcastle KA, et al. The effect of multiple adverse childhood experiences on health: a systematic review and meta-analysis. *Lancet Public Health*. 2017;2(8):e356-e366. doi:10.1016/S2468-2667(17)30118-4
65. Goodman E, Slap GB, Huang B. The Public Health Impact of Socioeconomic Status on Adolescent Depression and Obesity. *Am J Public Health*. 2003;93(11):1844-1850. doi:10.2105/AJPH.93.11.1844
66. Organization for Economic Cooperation and Development. *Adjusting Household Incomes: Equivalence Scales*. Organization for Economic Cooperation and Development Accessed April 28, 2022. <https://www.oecd.org/els/soc/OECD-Note-EquivalenceScales.pdf>
67. Chen P, Harris KM. Association of Positive Family Relationships With Mental Health Trajectories From Adolescence to Midlife. *JAMA Pediatr*. 2019;173(12):e193336. doi:10.1001/jamapediatrics.2019.3336

68. Sieving RE, McNeely CS, Blum RW. Maternal Expectations, Mother-Child Connectedness, and Adolescent Sexual Debut. *Arch Pediatr Adolesc Med*. 2000;154(8):809. doi:10.1001/archpedi.154.8.809
69. Ross CE, Mirowsky J. Neighborhood disadvantage, disorder, and health. *J Health Soc Behav*. 2001;42(3):258-276.
70. Zou G. A Modified Poisson Regression Approach to Prospective Studies with Binary Data. *Am J Epidemiol*. 2004;159(7):702-706. doi:10.1093/aje/kwh090
71. Lumley T. Analysis of Complex Survey Samples. *J Stat Softw*. 2004;9(8). doi:10.18637/jss.v009.i08
72. Chen P. Guidelines for Analyzing Add Health Data. Published online 2014. doi:10.17615/C6BW8W
73. Harel O, Mitchell EM, Perkins NJ, et al. Multiple Imputation for Incomplete Data in Epidemiologic Studies. *Am J Epidemiol*. 2018;187(3):576-584. doi:10.1093/aje/kwx349
74. Su YS, Gelman A, Hill J, Yajima M. Multiple Imputation with Diagnostics ( **mi** ) in R : Opening Windows into the Black Box. *J Stat Softw*. 2011;45(2). doi:10.18637/jss.v045.i02
75. Lumley T. mitools: Tools for Multiple Imputation of Missing Data. Published online April 26, 2019. Accessed July 22, 2022. <https://CRAN.R-project.org/package=mitools>
76. VanderWeele TJ, Knol MJ. A Tutorial on Interaction. *Epidemiol Methods*. 2014;3(1). doi:10.1515/em-2013-0005
77. Bureau UC. 2020 Census Illuminates Racial and Ethnic Composition of the Country. Census.gov. Accessed March 7, 2022. <https://www.census.gov/library/stories/2021/08/improved-race-ethnicity-measures-reveal-united-states-population-much-more-multiracial.html>
78. McGuire TG, Miranda J. New Evidence Regarding Racial And Ethnic Disparities In Mental Health: Policy Implications. *Health Aff (Millwood)*. 2008;27(2):393-403. doi:10.1377/hlthaff.27.2.393
79. Braveman PA, Cubbin C, Egerter S, et al. Socioeconomic Status in Health Research: One Size Does Not Fit All. *JAMA*. 2005;294(22):2879. doi:10.1001/jama.294.22.2879

**Table 1.** Participant characteristics and outcomes<sup>a</sup> stratified by race, Add Health 1994-2008

| <b>Characteristic</b>                   | <b>Overall</b><br>12,372 (100%) | <b>White</b><br>7,742 (74%) | <b>Black</b><br>2,915 (17%) | <b>Asian</b><br>805 (3.2%) | <b>AI/NA</b><br>76 (0.6%) | <b>Multiracial</b><br>834 (5.8%) |
|-----------------------------------------|---------------------------------|-----------------------------|-----------------------------|----------------------------|---------------------------|----------------------------------|
| Male sex                                | 5,778 (51%)                     | 3,672 (51%)                 | 1,267 (50%)                 | 418 (53%)                  | 41 (64%)                  | 380 (50%)                        |
| Age                                     | 29.0                            | 28.9                        | 29.2                        | 29.2                       | 28.8                      | 28.8                             |
| Highest parental education              |                                 |                             |                             |                            |                           |                                  |
| Less than high school <sup>b</sup>      | 1,187 (11%)                     | 685 (9.6%)                  | 356 (17%)                   | 69 (13%)                   | 13 (29%)                  | 64 (11%)                         |
| High school diploma                     | 3,883 (35%)                     | 2,520 (34%)                 | 959 (42%)                   | 164 (24%)                  | 19 (34%)                  | 221 (33%)                        |
| Some college                            | 2,221 (18%)                     | 1,405 (19%)                 | 500 (16%)                   | 106 (10%)                  | 19 (24%)                  | 191 (22%)                        |
| College graduate or greater             | 4,897 (36%)                     | 3,039 (38%)                 | 1,043 (26%)                 | 445 (53%)                  | 24 (14%)                  | 346 (34%)                        |
| Household income <sup>c</sup>           | 23.5                            | 25.5                        | 14.4                        | 27.2                       | 13.2                      | 21.2                             |
| Parental support index (0-5)            | 3.33                            | 3.35                        | 3.26                        | 3.30                       | 3.38                      | 3.30                             |
| Neighborhood disadvantage (0-1)         | 0.14                            | 0.12                        | 0.23                        | 0.13                       | 0.23                      | 0.15                             |
| Elevated ( $\geq 4$ ) ACEs <sup>d</sup> | 4,402 (27%)                     | 3,207 (25%)                 | 648 (33%)                   | 260 (21%)                  | 15 (40%)                  | 272 (35%)                        |
| MetS                                    | 3,131 (29%)                     | 1,799 (27%)                 | 852 (38%)                   | 221 (27%)                  | 35 (56%)                  | 224 (31%)                        |
| Hypertension                            | 6,082 (52%)                     | 3,775 (51%)                 | 1,464 (55%)                 | 390 (46%)                  | 46 (66%)                  | 407 (50%)                        |
| Depression                              | 2,195 (33%)                     | 1,652 (35%)                 | 296 (26%)                   | 53 (17%)                   | 11 (32%)                  | 183 (35%)                        |
| Asthma                                  | 1,867 (15%)                     | 1,134 (15%)                 | 453 (15%)                   | 90 (10%)                   | 14 (16%)                  | 176 (24%)                        |
| Anxiety                                 | 1,518 (13%)                     | 1,179 (15%)                 | 182 (6.0%)                  | 26 (2.9%)                  | 4 (3.3%)                  | 127 (18%)                        |
| Suicidal ideation                       | 845 (7.4%)                      | 527 (7.2%)                  | 188 (7.4%)                  | 48 (6.0%)                  | 8 (15%)                   | 74 (10%)                         |
| Drug use                                | 3,965 (36%)                     | 3,049 (41%)                 | 356 (12%)                   | 197 (25%)                  | 30 (46%)                  | 333 (42%)                        |

Abbreviations: ACE = adverse childhood experience; MetS = metabolic syndrome

<sup>a</sup> Counts are unweighted; proportions (for categorical variables) and means (for continuous) are pooled estimates from 20 survey-weighted imputations

<sup>b</sup> Includes completed vocational school or GED

<sup>c</sup> Equivalence-scaled to adjust for household size

<sup>d</sup> ACE components measured variously across Waves 1, 3, and 4, and summed after imputation; see Appendix A for details

**Table 2.** Adjusted<sup>a</sup> overall and within-group RRs and 95% CIs associated with elevated ACEs, Add Health 1994-2008

| <b>Outcome</b>    | <b>Overall</b>           | <b>White</b>             | <b>Black</b>             | <b>Asian</b>      | <b>AI/NA</b>             | <b>Multiracial</b>       |
|-------------------|--------------------------|--------------------------|--------------------------|-------------------|--------------------------|--------------------------|
| MetS              | 1.00 (0.98, 1.02)        | 1.03 (0.94, 1.12)        | 1.00 (0.97, 1.02)        | 1.00 (0.96, 1.05) | 0.99 (0.87, 1.13)        | 1.00 (0.78, 1.28)        |
| Hypertension      | 0.99 (0.97, 1.01)        | 0.99 (0.97, 1.01)        | 1.01 (0.96, 1.05)        | 1.02 (0.90, 1.16) | 0.86 (0.69, 1.07)        | 0.98 (0.91, 1.04)        |
| Asthma            | <b>1.04 (1.03, 1.06)</b> | <b>1.04 (1.02, 1.06)</b> | 1.02 (0.98, 1.07)        | 1.00 (0.93, 1.08) | 1.15 (0.93, 1.42)        | <b>1.13 (1.04, 1.22)</b> |
| Depression        | <b>1.13 (1.10, 1.16)</b> | <b>1.13 (1.09, 1.16)</b> | <b>1.13 (1.08, 1.18)</b> | 1.10 (0.98, 1.24) | 1.21 (0.90, 1.61)        | <b>1.14 (1.07, 1.22)</b> |
| Anxiety           | <b>1.05 (1.03, 1.07)</b> | <b>1.05 (1.03, 1.08)</b> | 1.03 (1.00, 1.06)        | 0.98 (0.95, 1.00) | 0.99 (0.92, 1.07)        | <b>1.12 (1.04, 1.19)</b> |
| Suicidal ideation | <b>1.05 (1.03, 1.07)</b> | <b>1.05 (1.03, 1.07)</b> | <b>1.05 (1.01, 1.09)</b> | 1.08 (1.00, 1.17) | 1.07 (0.84, 1.37)        | 1.05 (0.98, 1.12)        |
| Drug use          | <b>1.10 (1.08, 1.13)</b> | <b>1.11 (1.08, 1.13)</b> | <b>1.08 (1.03, 1.12)</b> | 1.08 (0.95, 1.23) | <b>1.30 (1.06, 1.60)</b> | <b>1.13 (1.07, 1.20)</b> |

Abbreviations: RR = risk ratio, CI = confidence interval, ACE = adverse childhood experience; MetS = metabolic syndrome

Boldface indicates statistical significance (95% CI does not include null)

<sup>a</sup> Models adjusted for participant age, sex, parental education, household size-adjusted income, parental support, and neighborhood disadvantage score

**Table 3.** Exponentiated interaction<sup>a</sup> term betas and 95% CIs from regression analyses, Add Health 1994-2008

| <b>Outcome</b>    | <b>White</b>      | <b>Black</b>             | <b>Asian</b>             | <b>AI/NA</b>             | <b>Multiracial</b> | <b>p-value</b>     |
|-------------------|-------------------|--------------------------|--------------------------|--------------------------|--------------------|--------------------|
| MetS              | 0.97 (0.89, 1.06) | 0.98 (0.89, 1.07)        | 0.97 (0.82, 1.14)        | 0.97 (0.76, 1.24)        | (ref.)             | 0.98               |
| Hypertension      | 1.01 (0.94, 1.09) | 1.03 (0.95, 1.12)        | 1.05 (0.91, 1.21)        | 0.88 (0.70, 1.10)        | (ref.)             | 0.65               |
| Asthma            | 0.92 (0.85, 1.00) | 0.91 (0.83, 1.00)        | 0.89 (0.79, 1.00)        | 1.02 (0.82, 1.28)        | (ref.)             | 0.21               |
| Depression        | 0.98 (0.91, 1.06) | 0.99 (0.91, 1.07)        | 0.96 (0.84, 1.10)        | 1.05 (0.78, 1.42)        | (ref.)             | 0.97               |
| Anxiety           | 0.94 (0.88, 1.02) | <b>0.93 (0.86, 0.99)</b> | <b>0.87 (0.82, 0.94)</b> | <b>0.89 (0.81, 0.97)</b> | (ref.)             | *** < <b>0.001</b> |
| Suicidal ideation | 1.00 (0.93, 1.08) | 1.00 (0.92, 1.09)        | 1.03 (0.93, 1.15)        | 1.02 (0.79, 1.32)        | (ref.)             | 0.96               |
| Drug use          | 0.98 (0.92, 1.04) | 0.95 (0.89, 1.02)        | 0.96 (0.83, 1.11)        | 1.15 (0.93, 1.42)        | (ref.)             | 0.29               |

Abbreviations: CI = confidence interval, ACE = adverse childhood experience; MetS = metabolic syndrome

Boldface indicates statistical significance (global Wald test \*  $p < 0.05$ , \*\*  $p < 0.01$ , \*\*\* $p < 0.001$ )

<sup>a</sup> Race  $\times$  elevated ACEs interaction, Multiracial as referent group

**Table 4.** Excess<sup>a</sup> cases<sup>b</sup> per 1,000 and 95% CIs<sup>c</sup> associated with elevated ACEs, Add Health 1994-2008

| <b>Outcome</b>    | <b>White</b>           | <b>Black</b>            | <b>Asian</b>            | <b>AI/NA</b>            | <b>Multiracial</b> |
|-------------------|------------------------|-------------------------|-------------------------|-------------------------|--------------------|
| MetS              | -26 (-108, 52)         | -20 (-108, 62)          | -27 (-176, 117)         | -23 (-263, 239)         | (ref.)             |
| Hypertension      | 14 (-65, 96)           | 33 (-56, 125)           | 49 (-100, 218)          | -148 (-382, 116)        | (ref.)             |
| Asthma            | <b>-123 (-251, -4)</b> | <b>-141 (-285, -6)</b>  | <b>-169 (-334, -7)</b>  | 23 (-287, 383)          | (ref.)             |
| Depression        | -17 (-114, 76)         | -30 (-133, 67)          | -65 (-225, 96)          | 63 (-278, 494)          | (ref.)             |
| Anxiety           | -71 (-165, 25)         | <b>-100 (-189, -10)</b> | <b>-163 (-247, -79)</b> | <b>-144 (-252, -42)</b> | (ref.)             |
| Suicidal ideation | 3 (-83, 87)            | 1 (-95, 91)             | 38 (-87, 166)           | 30 (-271, 354)          | (ref.)             |
| Drug use          | -50 (-199, 88)         | -147 (-309, 2)          | -122 (-429, 199)        | 359 (-140, 865)         | (ref.)             |

Abbreviations: CI = confidence interval, ACE = adverse childhood experience; MetS = metabolic syndrome  
 Boldface indicates statistical significance (95% CI does not include null)

<sup>a</sup> Multiracial as referent group

<sup>b</sup> Rounded to nearest whole person

<sup>c</sup> 95% CIs calculated from 10,000 resamples of interaction contrast
